# Supplementary material for: Human alveolar epithelial cells type II are capable of TGFβ-dependent epithelial-mesenchymal-transition and collagen-synthesis
Source: Respir Res. 2018 Jul 24;19:138. doi: 10.1186/s12931-018-0841-9 (PMC6056940; doi:10.1186/s12931-018-0841-9)
Supplement: Supplementary file 1 — Table S4. Patient data. Spreadsheet containing patient characteristics (gender, age at diagnosis, COPD status, packyears and smoking-status). (XLSX 10 kb) [file 12931_2018_841_MOESM1_ESM.xlsx]

## Sheet: Tabelle1
ID	gender (m/f)	age at diagnosis	COPD	Packyears	smoking status
13114-12	m	69	no	55	ex-smoker
13035-12	m	75	no	40	ex-smoker
944-13	f	64	yes	not available	not available
12722-12	m	67	yes	55	current smoker
12456-12	f	75	no	50	ex-smoker
12668-12	m	64	no	not available	not available
12928-12	m	74	no	55	ex-smoker
13035-12	m	75	no	40	ex-smoker
4537-16	m	70	no	not available	ex-smoker
4826-16	m	63	no	100	ex-smoker
4384-16	f	68	no	10	ex-smoker
4014-16	m	78	no		not available
3431-16	m	73	no	10	ex-smoker
3750-16	m	74	no	20	ex-smoker
3611-16	m	72	no	20	ex-smoker
1338-16	m	75	not available	not available	not available
2134-16	f	54	no	not available	not available
15136-12	m	73	no	not available	not available
15463-12	m	45	no	not available	not available
15724-12	m	66	no	80	ex-smoker
15867-12	m	56	yes	not available	not available
16050-12	f	61	not available	not available	not available
15860-12	m	56	yes	not available	not available
13914-12	m	74	no	not available	not available
4108-17	f	40	not available	not available	not available
4262-17	f	71	not available	not available	not available
4263-17	f	73	not available	not available	not available
	Mean age	66.8519
	SD	9.5704
