# Supplementary material for: Human alveolar epithelial cells type II are capable of TGFβ-dependent epithelial-mesenchymal-transition and collagen-synthesis
Source: Respir Res. 2018 Jul 24;19:138. doi: 10.1186/s12931-018-0841-9 (PMC6056940; doi:10.1186/s12931-018-0841-9)
Supplement: Supplementary file 4 — Table S2. Results from Reactome FIViz module analysis. Spreadsheet containing results from network analysis using Cytoscape and the Reactome FIViz app for discovery of interaction modules. (XLSX 10 kb) [file 12931_2018_841_MOESM4_ESM.xlsx]

## Sheet: Transcriptional Modules 
Module	Nodes in Module	Node Percentage	Samples in Module	Sample Percentage	Node List
I	50	0.1873			ABLIM2,ACTA1,ANGPTL4,ANKRD1,ANKRD2,ASB2,BASP1,CALD1,CAPN6,CKMT2,CNN1,DNAJC22,DPYSL3,DYNC1I1,EEF1A2,ENO3,FABP3,FERMT1,FLNA,FLNC,FSCN1,HCN4,HSPA12A,KANK4,LCP1,LDB3,MICAL3,MYL7,MYLK,MYOZ1,NCS1,NPPB,PALLD,PDLIM7,PPP1R12B,RAB9B,SCN3B,SCN9A,SH3GL3,SLC27A6,SLC7A5,SORBS2,SP6,SPTA1,TAGLN,TPM1,UBE2J1,VIL1,ZFP57,ZNF697
II	47	0.176			AFAP1L2,AFP,BMP8A,BMP8B,CDH11,CDH2,CDH4,CDKN2A,CSF1R,DLX2,DMRT1,EDIL3,EFHD1,EGF,ETS2,FGF1,FGF11,GDNF,GLI2,HNF4A,IGF1,IHH,IL11,IL20RB,INHBE,KCTD11,KRT14,KRT17,KRT8,LIF,MAFB,MCAM,NCCRP1,NOG,NOTCH3,PADI2,PKP1,PKP2,PLXDC2,PTHLH,RGMA,SEMA3C,SGCA,SOX9,TCF7,WNT7A,WNT7B
III	37	0.1386			ADAMTS6,COL1A1,COL22A1,COL4A1,COL4A2,COL5A1,COL7A1,CTGF,EGLN3,FN1,FNDC5,FOXS1,IGFBP3,IGFBP7,ITGA11,ITGA2,ITGB3,KLK6,LOX,LYPD1,MMP7,NPNT,NXPH4,OLR1,P4HA3,PCDH7,PDGFB,PROCR,QPCT,SEMA7A,SERPINE1,SKIL,TGFBI,TGM2,THBS1,TIMP4,TNC
IV	28	0.1049			CACNG4,DGKI,DIRAS2,EPHB2,FHL3,GPR115,GPR123,IER3,LGR5,LRRC38,LRRN2,MXRA5,OLFM2,OR10AD1,OR52W1,PODNL1,PRKACB,RASD2,RASGRF2,RASGRP3,RASL11B,RASL12,RND1,RRAD,STK38L,SYNDIG1,TMEM233,TSKU
V	26	0.0974			BAAT,CSPG5,DCLK2,DSE,EXTL1,GPC6,HS3ST2,IGF2BP3,KALRN,KIF1A,KIF26B,NDST3,NGEF,NHS,OPN3,PMEPA1,RAB3B,SLC7A1,SLC7A11,SPINK1,STC1,SULT1E1,TNFAIP8,TP63,TYRO3,XYLT1
VI	20	0.0749			ALOX5,CARD11,FOSB,GADD45B,GPR183,GPX3,LCP2,NCF2,NLRP1,NLRP3,RASSF2,SIK1,SLC22A3,SLC7A7,UBASH3B,UCN2,USP2,VAV1,VNN1,VNN2
VII	19	0.0712			ADM2,CRABP2,CRH,CSDC2,EDN1,GPR68,GUCA2A,KCNK3,KISS1,MAMDC2,MURC,NPR3,P2RY6,PDCD1LG2,PLD5,PTGER2,TFAP2A,ULBP1,UTS2D
VIII	8	0.03			CNTN1,CNTNAP2,DACT1,LFNG,NEURL1B,PRSS1,PRSS3,VWA1
IX	5	0.0187			ACY3,AKR1C1,AKR1C4,GFOD1,IFFO2
X	5	0.0187			CST6,CTSL2,CYP24A1,KLK5,NIPAL4
XI	4	0.015			CLDN14,CLDN2,CLDN6,CLDN9
XII	3	0.0112			CXCR7,HTR1D,S1PR5
XIII	3	0.0112			PHGDH,PSAT1,TRIM55
XIV	2	0.0075			C8B,KIAA0825
XV	2	0.0075			GLIPR1,GLIPR2
XVI	2	0.0075			JPH2,SMOX
XVII	2	0.0075			SIRPB1,SIRPG
XVIII	2	0.0075			AQP10,KIRREL3
XIX	2	0.0075			FAM131B,TMEM59L
